# Supplementary material for: New probe design strategy by cooperation of metal/DNA-ligation and supermolecule inclusion interaction: application to detection of mercury ions(II)
Source: Royal Society of Chemistry journal article supplement (doi:10.1039/c3an00122a), 2013-01-01
Supplement: c3an00122a.pdf [file c3an00122a.pdf]

## Supplementary materials

### New Probe Design Strategy by Cooperation of Metal/DNA-Ligation and Supramolecule Inclusion Interaction: Application to Detection of Mercury Ions(II)

Xiaoxia Gao, Ting Deng, Jishan Li, Ronghua Yang, Guoli Shen, Ruqin Yu

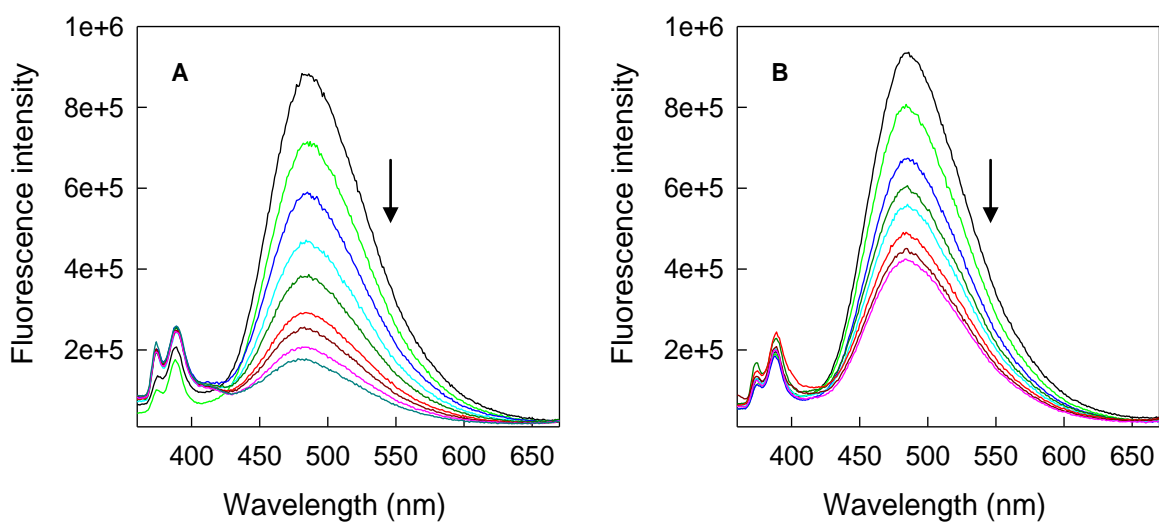

**Figure S1.** Spectra of 100 nM P2 upon different concentrations of Cu<sup>2+</sup> (A) and Cd<sup>2+</sup> (B). (Arrow is pyrene-dimer fluorescence change with the increase concentration of Cu<sup>2+</sup> or Cd<sup>2+</sup>). Excitation wavelength was 345 nm.

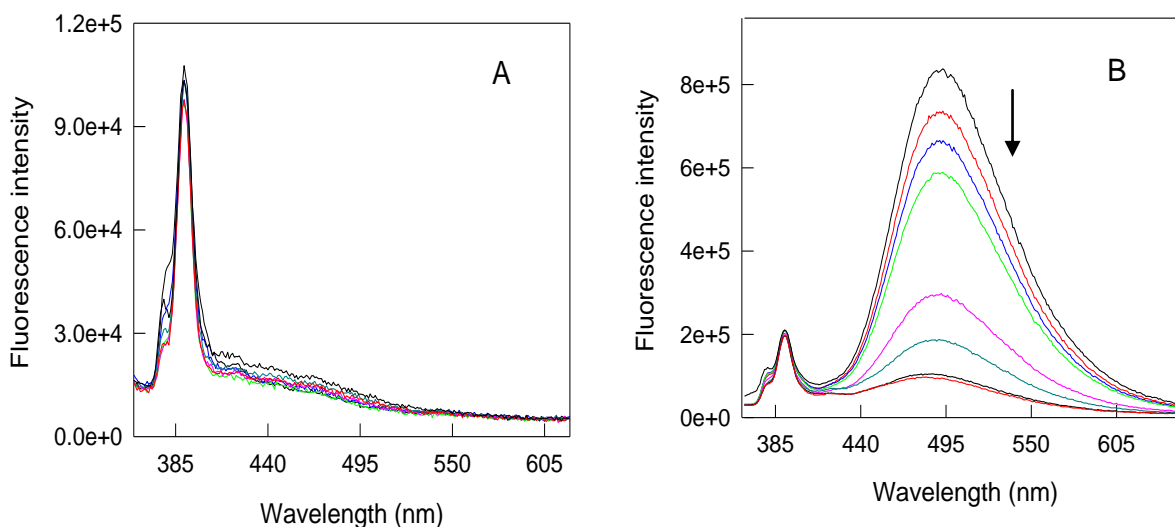

**Figure S2.** Fluorescence emission spectra of P1 (A) or P2 (B) upon different concentrations of Hg<sup>2+</sup> (arrow is pyrene-dimer fluorescence change with the increase concentration of Hg<sup>2+</sup>). The concentration of P1 or P2 is 100 nM and the excitation was at 345 nm.

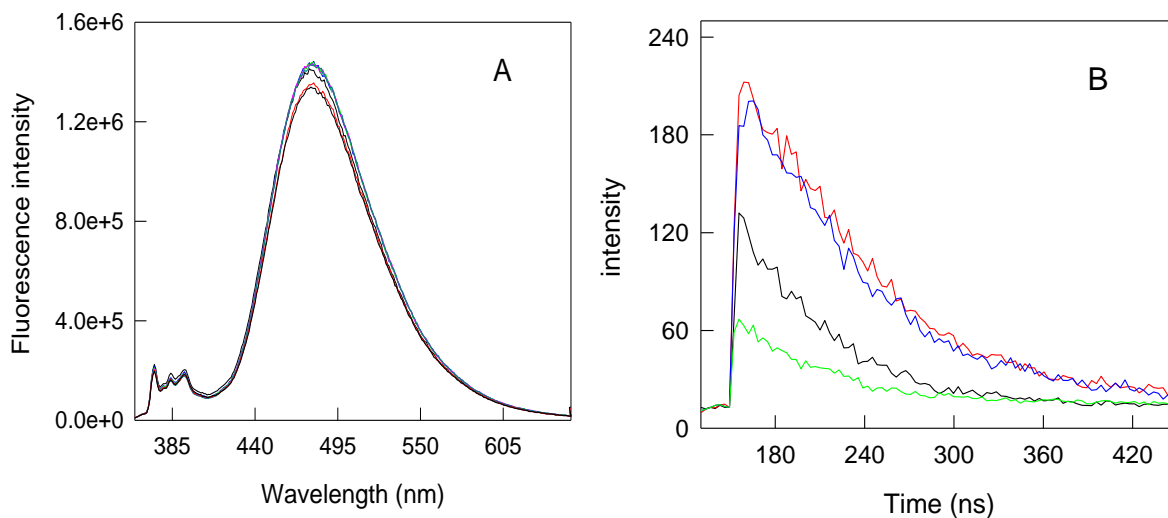

**Figure S3.** Effect of  $\gamma$ -CD on the pyrene dimer. (A) Fluorescence records of 100 nM P2 upon different concentrations of Hg<sup>2+</sup> in the presence of 5mM  $\gamma$ -CD. (B) Fluorescence decays of P2 under different conditions. Curve a, 100 nM of P2; Curve b, 100 nM of P2 + 5  $\mu$ M of Hg<sup>2+</sup>; Curve c, 100 nM of P2 + 5 mM of  $\gamma$ -CD; Curve d, 100 nM of P2 + 5 mM of  $\gamma$ -CD + 5  $\mu$ M of Hg<sup>2+</sup>.

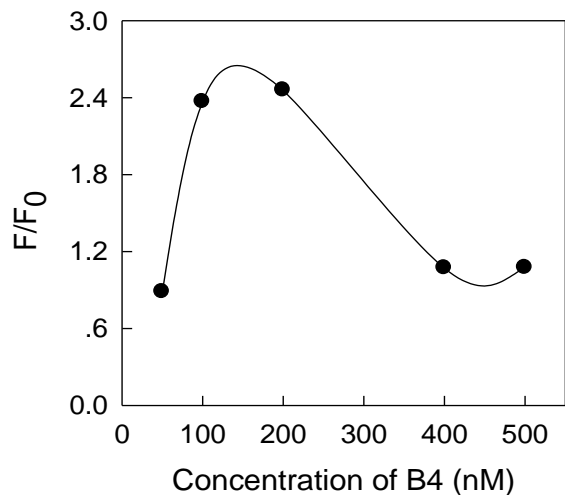

**Figure S4.** Optimization of the concentration of block DNA (B4). Excitation wavelength was 345 nm and fluorescence records were carried out at 478nm. Where  $F_0$  and  $F$  are the fluorescence intensity of P1 in the absence and presence of  $5 \mu\text{M Hg}^{2+}$ , respectively. The reaction solution contains 100 nM of P1 and 5 mM of  $\gamma\text{-CD}$ .

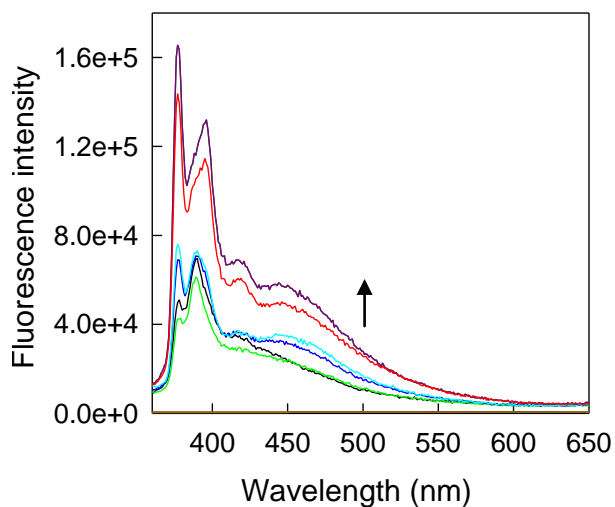

**Figure S5.** Fluorescence spectra of 100 nM of P1 and 200 nM of B4 with different concentration of  $\gamma\text{-CD}$ . Excitation wavelength was 345 nm (arrow is pyrene-dimer fluorescence change with the increase concentration of  $\gamma\text{-CD}$ ).
